# Supplementary material for: Biogenic FeS nanoparticles modulate the extracellular electron transfer and schwertmannite transformation
Source: Royal Society of Chemistry journal article supplement (doi:10.1039/d3en00316g), 2023-01-01
Supplement: d3en00316g1.pdf [file d3en00316g1.pdf]

## Supplementary Information

### **Biogenic FeS nanoparticles modulate the extracellular electron transfer and schwertmannite transformation**

Changdong Ke <sup>a</sup>, Siyu Zhang <sup>a</sup>, Chuling Guo <sup>a, b, \*</sup>, Yanping Deng <sup>a</sup>, Yuancheng Li <sup>a</sup>,  
Qian Yao <sup>a</sup>, Xiaohu Jin <sup>a</sup>, Zhi Dang <sup>a, b, c</sup>

<sup>a</sup> School of Environment and Energy, South China University of Technology, Guangzhou, 510006, China

<sup>b</sup> The Key Laboratory of Pollution Control and Ecosystem Restoration in Industry Clusters, Ministry of Education, Guangzhou, 510006, China

<sup>c</sup> Guangdong Provincial Key Laboratory of Solid Wastes Pollution Control and Recycling, South China University of Technology, Guangzhou, 510006, China

\*Corresponding authors: School of Environment and Energy, South China University of Technology, Guangzhou 510006, P.R. China; Tel: +86-20-39380508, Fax: +86-20-39380508

E-mail addresses: clguo@scut.edu.cn (Chuling Guo).

### **Text S1: Preparation of schwertmannite (Sch)**

Sch was precipitated from a ferrous sulfate solution using the H<sub>2</sub>O<sub>2</sub> method as described previously.<sup>1</sup> Briefly, 5 mL of H<sub>2</sub>O<sub>2</sub> (30%) and 10 g of FeSO<sub>4</sub>•7H<sub>2</sub>O were added to 1 L of deionized water at 25°C and incubated for 24 h. The resultant ochre-colored precipitates were frequently washed with deionized water until the supernatant specific conductance was below 5 µs/cm and then they were freeze-dried.

### **Text S2: Composition of the modified medium**

The modified medium contained (g/L): 0.1 KH<sub>2</sub>PO<sub>4</sub>, 1.0 NH<sub>4</sub>Cl, 0.1 CaCl<sub>2</sub>, 0.5 MgCl•6H<sub>2</sub>O, 5.6 sodium lactate (60%), 4.76 HEPES (4-(2-hydroxyethyl)-1-piperazine ethyl sulfonic acid) and trace elements (1 mL). Trace elements were prepared as described by Myers and Nealson.<sup>2</sup> The medium was sterilized for 30 min at 121°C and cooled down before experiment.

### **Text S3: Sample analyses**

Fe<sup>2+</sup> concentrations were analyzed through the 1,10-phenanthroline method, using an ultraviolet-visible spectrophotometer (UV-160A, Shimadzu, Japan).<sup>3</sup> Ion chromatography (DIONEX ICS-1500, 148 Sunnyvale, USA) was applied to determine SO<sub>4</sub><sup>2-</sup> concentration. Lactate and acetate concentrations were determined using High performance liquid chromatography (HPLC, Agilent LC 1260, USA).<sup>4</sup>

Solid-phase samples were rinsed once with deoxygenated deionized water, dried and preserved under anoxic conditions until further analysis. X-ray diffraction (XRD) with Cu K $\alpha$  radiation (Bruker Advance D8, Germany) was applied to analyze the changes in mineral phases at the end of the incubation. Samples were scanned with a 0.05° 2 $\theta$  step-size and 2 s count time from 10° ~ 80° 2 $\theta$ . The morphology of secondary minerals was identified by scanning electron microscope (SEM) (ZEISS Merlin3700, Germany). Transmission electron microscopy (TEM; FEI Talos F200X and Hitachi HT7700 Hitachi H-7000FA 100Kv) required with energy dispersive spectroscopy (EDS; Oxford X-Max) was used to observe the morphology and distribution of the solid phase and bacteria.

### **Text S4: The qPCR reaction system and procedure**

The qPCR reaction system and procedure were as described by Ke et al.<sup>5</sup> The reactions were performed in a total volume of 20 µL with 10 µL 2x SYBR Green

qPCR Master Mix and 0.4  $\mu$ l ROX Reference Dye (APExBIO, Houston, USA), 0.5  $\mu$ L each primer (10  $\mu$ M), and 1  $\mu$ L of DNA template. The procedures were 95°C initial denaturation 2 min, 40 cycles of 95°C denaturation 15 s, and 60°C annealing 30 s. The melting curve was obtained by heating the sample from 60°C to 95°C. Every sample was measured in triplicate to guarantee the accuracy.

Table S1 Primers used in this study

| Primer         | Sequence (5'-3')           | Amplicon Size (bp) | Reference  |
|----------------|----------------------------|--------------------|------------|
| <i>recA</i> -F | GTGATGAGGTGGTTGGTAACGAGAC  | 117                | 5          |
| <i>recA</i> -R | CGCCAGTACGGTTGATACCTTGAC   |                    |            |
| <i>mtrC</i> -F | ATGGTGCACCTATGGTCACTG      | 150                | 5          |
| <i>mtrC</i> -R | AGCCTAAGCCTTGCCAGTTAG      |                    |            |
| <i>cymA</i> -F | GCGAAATATTCCATCCTAGCGC     | 152                | 5          |
| <i>cymA</i> -R | GCCAGCACTTCATTCTTCAAGG     |                    |            |
| <i>omcA</i> -F | ATGCCAAGAAAGAACCCG         | 115                | 5          |
| <i>omcA</i> -R | TGGTCTACTAAACAAGTGTCGC     |                    |            |
| <i>phsA</i> -F | ATGTGGTCAGCGGGTGGAAATTTATC | 103                | This study |
| <i>phsA</i> -R | GCATTGGGTTGGTACGGGACATC    |                    |            |

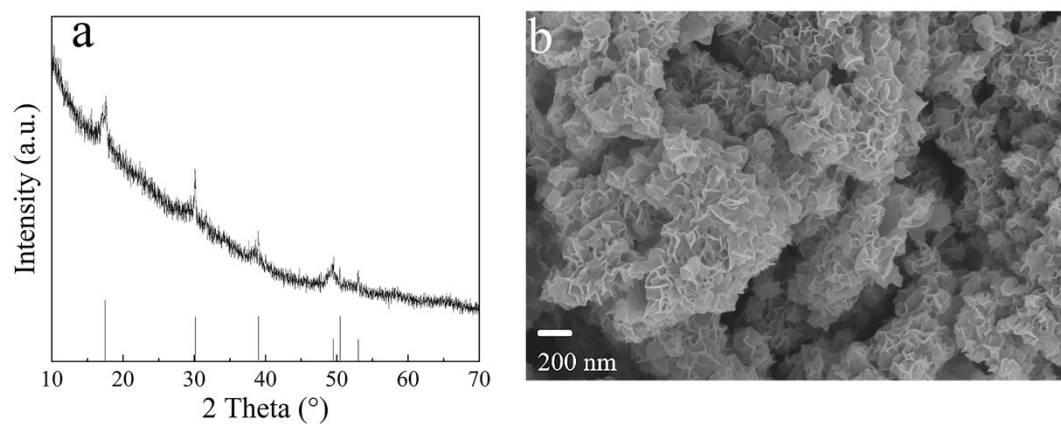

Fig. S1 XRD (a) and SEM images (b) of the FeS NPs.

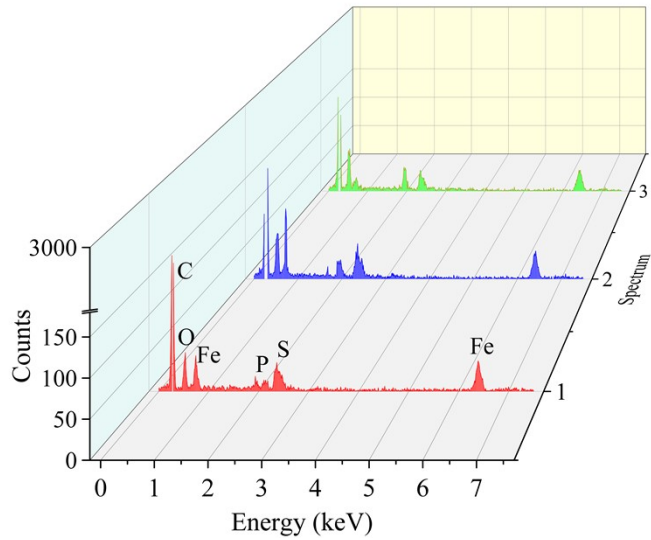

Fig. S2 Determination of element distribution of minerals on cell surface by EDS. The number on the Z-axis corresponds to the number in Fig. 1e.

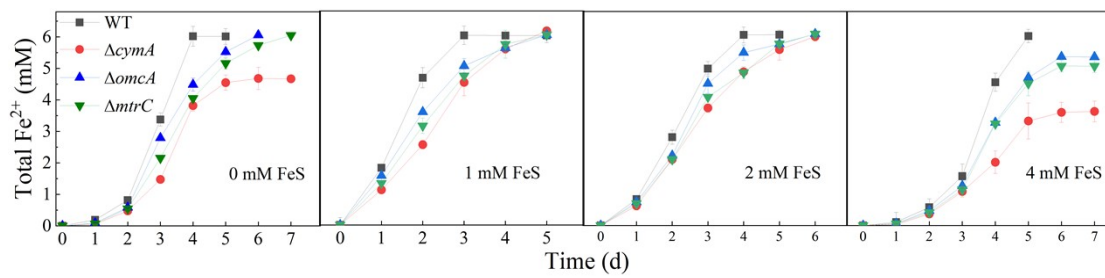

Fig. S3 The total Fe<sup>2+</sup> concentration during the Sch reduction by *S. oneidensis* MR-1 (WT) and its mutants.

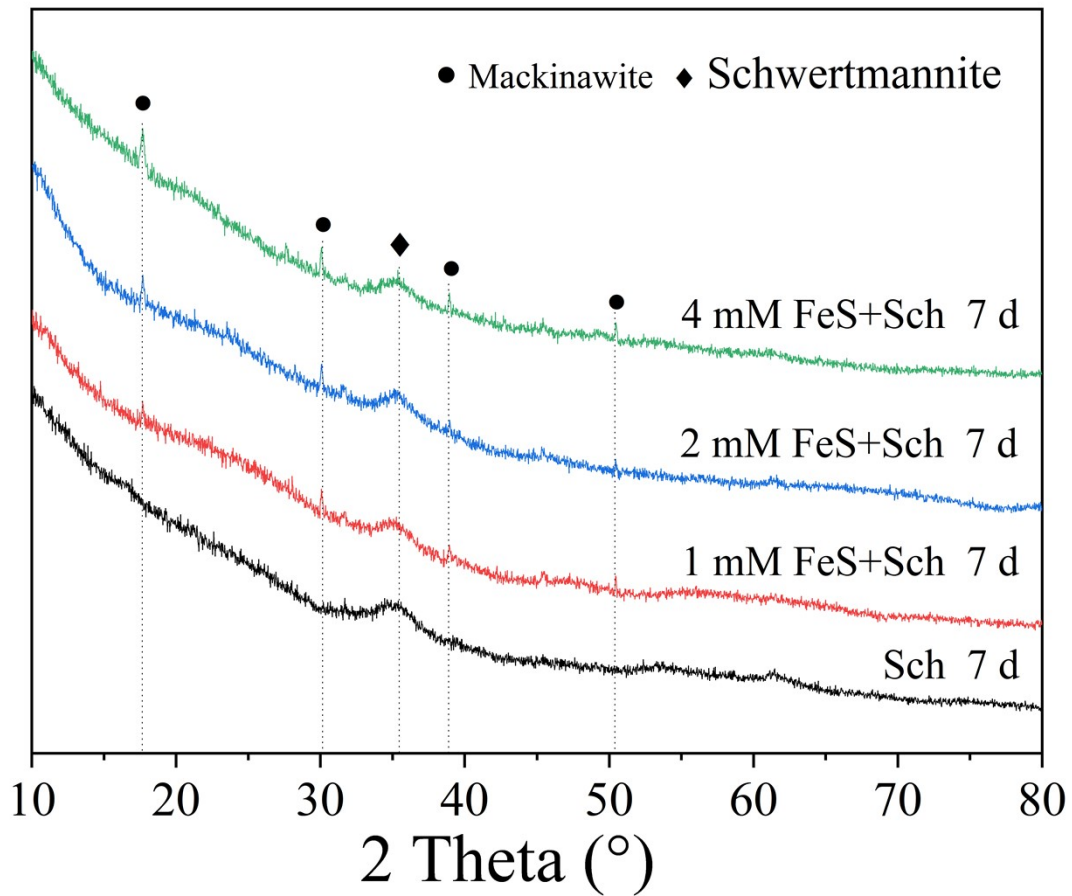

Fig. S4 The interaction of FeS and Sch in the absence of *S. oneidensis* MR-1.

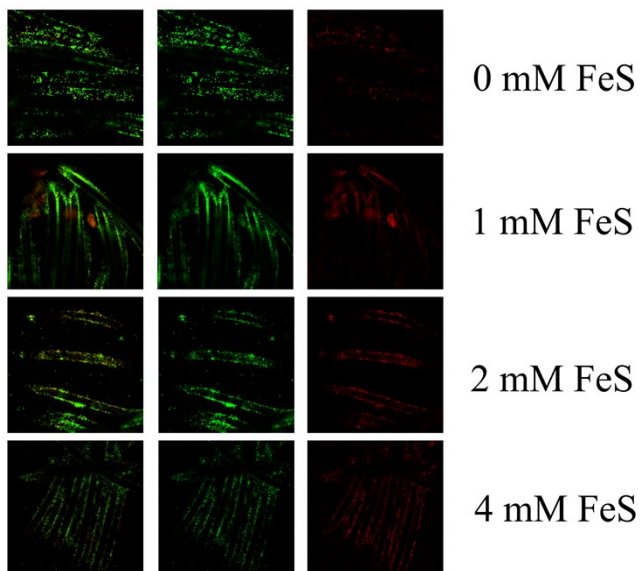

Fig. S5 The cell viability was detected by CLSM.

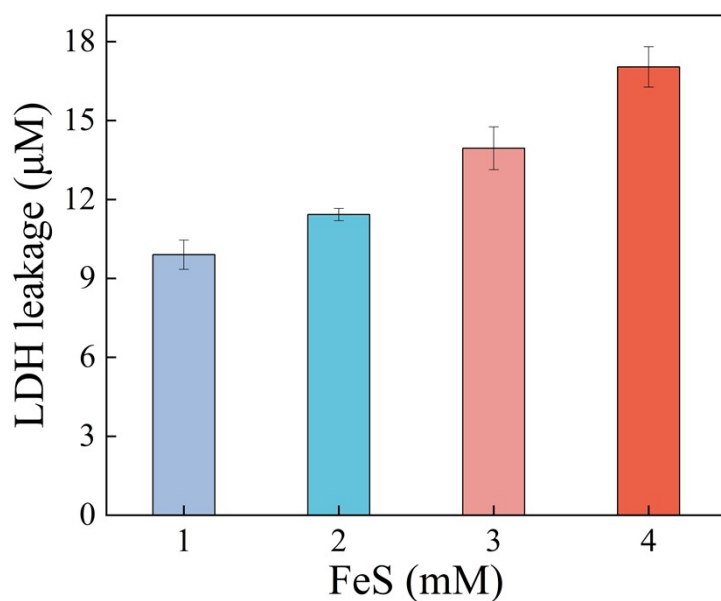

Fig. S6 The cell viability was detected by LDH leakage.

### Reference

1. S. Regenspurg, A. Brand and S. Peiffer, Formation and stability of schwertmannite in acidic mining lakes 11Associate editor: C. M. Eggleston, *Geochim. Cosmochim. Ac.*, 2004, **68**, 1185-1197.
2. C. R. Myers and K. H. Nealson, Bacterial manganese reduction and growth with manganese oxide as the sole electron acceptor, *Science*, 1988, **240**, 1319-1321.
3. N. Brand, G. Mailhot and M. Bolte, Degradation photoinduced by Fe (III): method of alkylphenol ethoxylates removal in water, *Environ. Sci. Technol.*, 1998, **32**, 2715-2720.
4. D. B. Albert and C. S. Martens, Determination of low-molecular-weight organic acid concentrations in seawater and pore-water samples via HPLC, *Mar. Chem.*, 1997, **56**, 27-37.
5. C. Ke, C. Guo, S. Zhang, Y. Deng, X. Li, Y. Li, G. Lu, F. Ling and Z. Dang, Microbial reduction of schwertmannite by co-cultured iron-and sulfate-reducing bacteria, *Sci. Total Environ.*, 2023, **861**, 160551.
